# Supplementary material for: Unlocking Overexpressed Membrane Proteins to Guide Breast Cancer Precision Medicine
Source: MDPI journal article supplement (doi:10.3390/cancers16071402), 2024-04-03
Supplement: s1 [file s1]

**Supplementary Table S1. List of antibodies used and their respective dilutions.**

| Antibody     | Company       | Catalog    | Dilution |
|--------------|---------------|------------|----------|
| ANTI-LRRC15  | Sigma-Aldrich | HPA035503  | 1:400    |
| ANTI-EFNA3   | Sigma-Aldrich | SAB1401123 | 1:400    |
| ANTI-TSPAN13 | Abcam         | ab121262   | 1:200    |
| ANTI-CA12    | Abcam         | ab218983   | 1:200    |

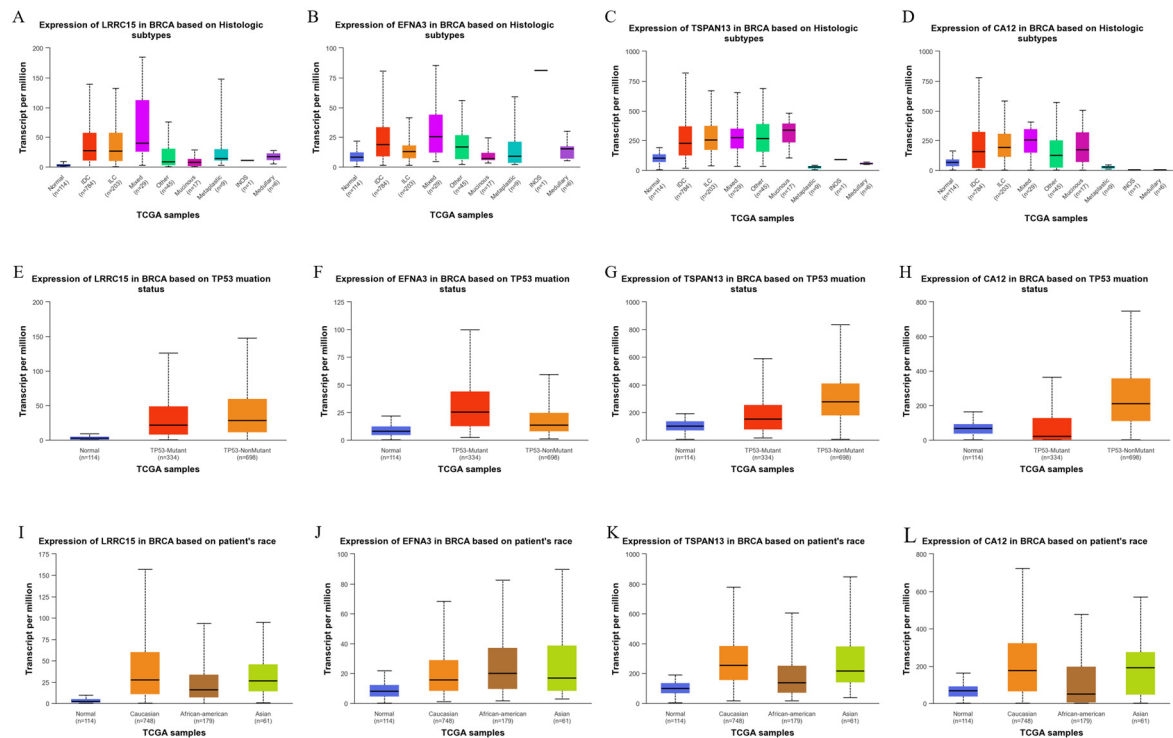

**Supplementary Figure S1. Gene expression of the four target genes in relation to the histologic subtype, TP53 mutation and race patients.** The y-axis represents the level of transcript per millon and the x-axis represents the samples based on patient's race, histologic

subtypes and TP53 mutation status. (A,E,I) LRRC15, (B,F,J) EFNA3, (C,G,K) TSPAN13, (D,H,L) CA12.

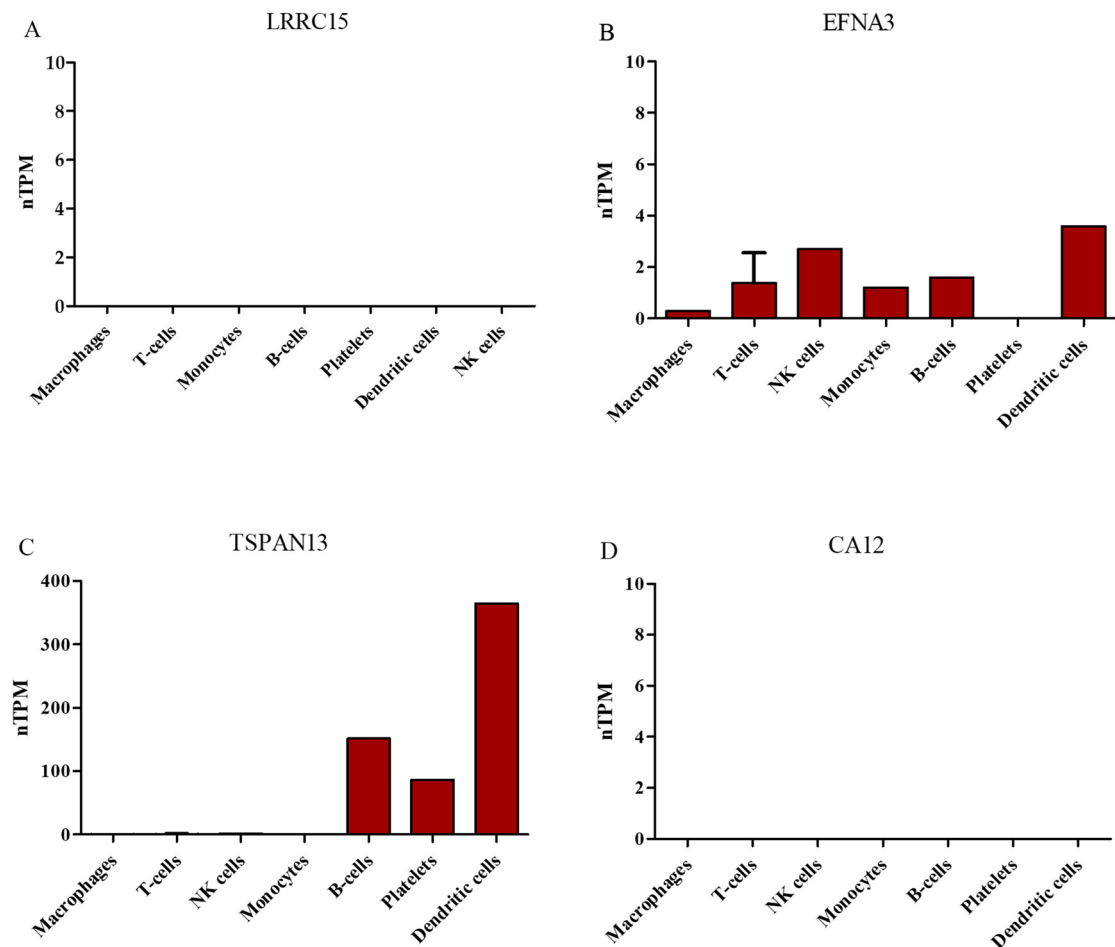

**Supplementary Figure S2. Single cell RNA (scRNA) gene expression of the 4 targets in PBMC cells.** The y-axis represents the normalized expression (nTPM) of the scRNA and the x-axis represents the different samples included in the study. (A) LRRC15, (B) EFNA3, (C) TSPAN13, (D) CA12.

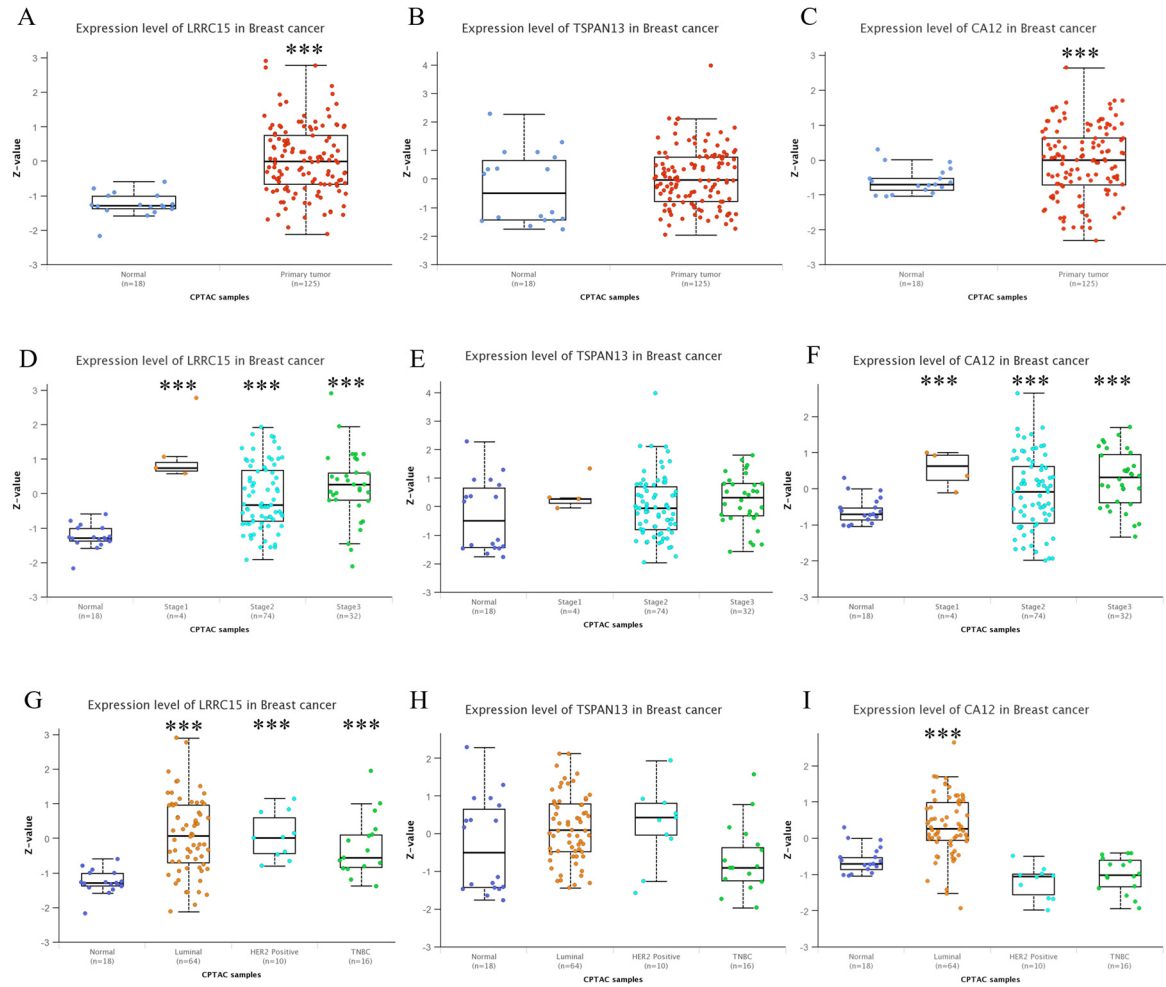

**Supplementary Figure S3. Protein expression profiles of LRRC15, TSPAN13, and CA12 targets in BC from UALCAN database.** Protein expression profiles of LRRC15, TSPAN13, and CA12 targets in the context of breast cancer. The comparison is as follows: (A–C) Normal samples (n=18) vs. Primary tumor samples (n=125). Blue bar: Normal samples. Red bar: Primary tumor samples. (D–F) Normal samples vs. Tumor staging. Orange bar: Stage 1 samples (n=4). Blue bar: Stage 2 samples (n=74). Green bar: Stage 3 samples (n=32). (G–I) Normal samples vs. Different molecular subtypes of breast cancer. Orange bar: Luminal samples (n=64). Blue bar: HER2 positive samples (n=10). Green bar: Triple Negative samples (n=16). Statistical significance was indicated by  $p < 0.01$  (\*\*\*) levels. Non-tumor breast tissue (Normal) was utilized as the statistical reference.

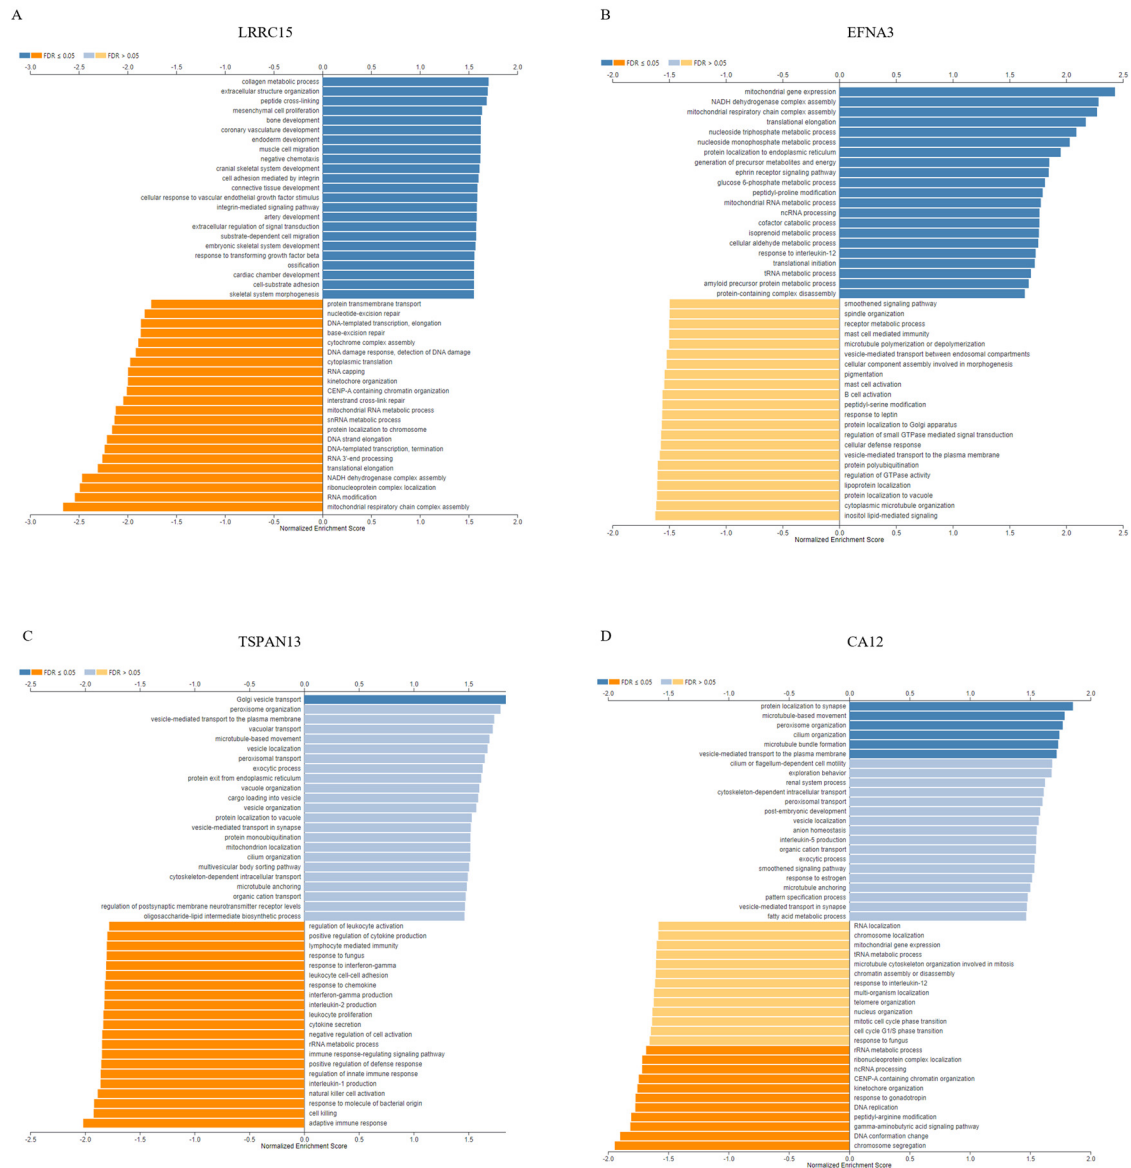

**Supplementary Figure S4: Enrichment plots from gene set enrichment analysis (GSEA).**

Visualization of (A) LRRC15, (B) EFNA3, (C) TSPAN13, (D) CA12 enriched pathways through LinkedOmics (<https://linkedomics.org>) in TCGA breast cancer platform.
