# Supplementary material for: Unlocking Overexpressed Membrane Proteins to Guide Breast Cancer Precision Medicine
Source: Cancers (Basel). 2024 Apr 3;16(7):1402. doi: 10.3390/cancers16071402 (PMC11011122; doi:10.3390/cancers16071402)
Supplement: Supplementary file 1 [file cancers-16-01402-s001.zip › cancers-2841087-supplementary Table S2.xlsx]

## Sheet: genemania-interactions_table su
Gene 1	Gene 2	Weight	Network group	Network	GO Annotation _ Biological process
TARDBP	LRRC15	0.07905694	Physical Interactions	Freibaum-Taylor-2010	intracellular protein transport; programmed cell death; signaling; others
KHDRBS2	LRRC15	0.17971997	Physical Interactions	Jeronimo-Coulombe-2007	mrna metabolic process
KHDRBS2	TARDBP	0.10991152	Physical Interactions	Jeronimo-Coulombe-2007	mrna metabolic process
NEK2	LRRC15	0.14401855	Physical Interactions	BIOGRID-SMALL-SCALE-STUDIES	mitotic cell cycle; cytoskeleton organization; chromosome segregation; mitotic nuclear division; others
RARA	LRRC15	0.106241874	Physical Interactions	BIOGRID-SMALL-SCALE-STUDIES	immune system process; regulation of dna-templated transcription; cell differentiation; anatomical structure development
ANXA5	LRRC15	0.2534079	Physical Interactions	Huttlin-Harper-2017	mitotic cell cycle ; programmed cell death; signaling; others
DDIT4L	LRRC15	0.2534079	Physical Interactions	Huttlin-Harper-2017	signaling;
FMOD	LRRC15	0.2534079	Physical Interactions	Huttlin-Harper-2017	signaling; extracellular matrix organization; protein-containing complex assembly
GSC	LRRC15	0.14630845	Physical Interactions	Huttlin-Harper-2017	signaling; cell differentiation; regulation of dna-templated transcription; anatomical structure development
POPDC2	LRRC15	0.14630845	Physical Interactions	Huttlin-Harper-2017	circulatory system process;cell differentiation; anatomical structure development
USP15	LRRC15	0.2116056	Physical Interactions	Sowa-Harper-2009	immune system process; signaling; chromatin organization;protein catabolic process
ANXA5	LRRC15	0.382112	Physical Interactions	Huttlin-Gygi-2015	mitotic cell cycle ; programmed cell death; signaling; others
NEK2	LRRC15	0.14243145	Physical Interactions	IREF-SMALL-SCALE-STUDIES	mitotic cell cycle; cytoskeleton organization; chromosome segregation; mitotic nuclear division; others
RARA	LRRC15	0.10337777	Physical Interactions	IREF-SMALL-SCALE-STUDIES	immune system process; regulation of dna-templated transcription; cell differentiation; anatomical structure development

## Sheet: genemania-interactions_EFNA3
Gene 1	Gene 2	Weight	Network group	Network	GO Annotation _ Biological process
KRTAP1-1	LCE2C	0.0035055587	Physical Interactions	IREF-huri
KRTAP1-1	LCE2C	0.0036229824	Physical Interactions	Luck-Calderwood-2020
EPHA4	EPHA7	0.025189694	Physical Interactions	Huttlin-Harper-2017	cell adhesion; signaling; cell differentiation; cell junction organization; anatomical structure development
EPHA2	EPHA7	0.07127607	Physical Interactions	IREF-SMALL-SCALE-STUDIES
EPHA2	EFNA3	0.072862945	Physical Interactions	IREF-SMALL-SCALE-STUDIES
PRSS23	EFNA3	0.0743722	Physical Interactions	IREF-hprd
KRTAP1-1	EFNA3	0.07728881	Physical Interactions	Luck-Calderwood-2020
KRTAP1-1	EFNA3	0.07733374	Physical Interactions	IREF-huri
EPHA3	EPHA7	0.08132011	Physical Interactions	Huttlin-Harper-2017	cytoskeleton organization; cell adhesion; vesicle-mediated transport; signaling; cell differentiation; cell junction organization; cell motility; anatomical structure development
EPHA4	EFNA3	0.09642409	Physical Interactions	IREF-SMALL-SCALE-STUDIES
EPHA2	EFNA3	0.11043519	Physical Interactions	IREF-hprd
EPHA3	EPHA7	0.11445998	Physical Interactions	IREF-SMALL-SCALE-STUDIES
EPHA4	EFNA3	0.137134	Physical Interactions	IREF-hprd
EPHA7	EFNA3	0.17174447	Physical Interactions	IREF-SMALL-SCALE-STUDIES
LCE2C	EFNA3	0.17430787	Physical Interactions	IREF-huri	cell diferenciation; anatomical structure development
PRSS23	EFNA3	0.17527938	Physical Interactions	IREF-matrixdb
EPHA7	EFNA3	0.17536758	Physical Interactions	IREF-bind-translation
EPHA3	EPHA7	0.17606826	Physical Interactions	IREF-matrixdb
LCE2C	EFNA3	0.18227433	Physical Interactions	Luck-Calderwood-2020
EPHA4	EFNA3	0.19558659	Physical Interactions	IREF-bind-translation
EPHA5	EFNA3	0.21304102	Physical Interactions	IREF-SMALL-SCALE-STUDIES
EPHA2	EFNA3	0.23495792	Physical Interactions	IREF-bind-translation	cell adhesion; programmed cell death; signaling; cell differentiation; cell motility; anatomical structure development
EPHA5	EFNA3	0.23495792	Physical Interactions	IREF-bind-translation	cytoskeleton organization; signaling; cell differentiation; anatomical structure development
EPHA6	EFNA3	0.23495792	Physical Interactions	IREF-bind-translation	signaling; cell differentiation; anatomical structure development
EPHA4	EFNA3	0.2486029	Physical Interactions	IREF-bind
EPHA5	EFNA3	0.2507834	Physical Interactions	IREF-hprd
EPHA6	EFNA3	0.2548129	Physical Interactions	IREF-SMALL-SCALE-STUDIES
EPHA3	EFNA3	0.26224908	Physical Interactions	BIOGRID-SMALL-SCALE-STUDIES	cytoskeleton organization; cell adhesion; signaling; cell differentiation; cell junction organization; cell motility; anatomical structure development
EPHA7	EFNA3	0.27448463	Physical Interactions	IREF-hprd
EPHA7	EFNA3	0.29389262	Physical Interactions	IREF-bind
EPHA2	EFNA3	0.29389262	Physical Interactions	IREF-bind
EPHA10	EFNA3	0.30875355	Physical Interactions	IREF-SMALL-SCALE-STUDIES
EPHA7	EPHA10	0.3619407	Physical Interactions	Huttlin-Harper-2017
EPHA7	EFNA3	0.3992114	Physical Interactions	BIOGRID-SMALL-SCALE-STUDIES	cell adhesion; programmed cell death; signaling; cell differentiation; cell junction organization; anatomical structure development
PRSS23	EFNA3	0.41924348	Physical Interactions	IREF-spike
EPHA10	EFNA3	0.60778123	Physical Interactions	IREF-quickgo	signaling; cell differentiation; anatomical structure development

## Sheet: genemania-interactions_TSPAN13
Gene 1	Gene 2	Weight	Network group	Network	GO Annotation _ Biological process
APP	TSPAN13	0.023224434	Physical Interactions	OlÃ¡h-OvÃ¡di-2011	intracellular protein transport
GLP1R	TSPAN13	0.11447084	Physical Interactions	BIOGRID-SMALL-SCALE-STUDIES	intracellular protein transport; circulatory and nervous system; signaling; transmembrane transport
GLP1R	TSPAN13	0.14663474	Physical Interactions	IREF-SMALL-SCALE-STUDIES	intracellular protein transport; circulatory and nervous system; signaling; transmembrane transport

## Sheet: genemania-interactions_CA12
Gene 1	Gene 2	Weight	Network group	Network		GO Annotation _ Biological process
IDH2	CA12	0.102153	Physical Interactions	IREF-reactome		carbohydrate metabolic process; generation of precursor metabolites and energy
PDHX	CA12	0.06586556	Physical Interactions	IREF-reactome		sulfur compound metabolic process; nucleobase-containing small molecule metabolic process
PDHB	CA12	0.06586556	Physical Interactions	IREF-reactome		carbohydrate metabolic process; generation of precursor metabolites and energy; sulfur compound metabolic process; nucleobase-containing small molecule metabolic process
PDHB	PDHX	0.02527906	Physical Interactions	IREF-reactome
DLAT	CA12	0.06586556	Physical Interactions	IREF-reactome		carbohydrate metabolic process; generation of precursor metabolites and energy; sulfur compound metabolic process; nucleobase-containing small molecule metabolic process
DLAT	PDHX	0.02527906	Physical Interactions	IREF-reactome
DLAT	PDHB	0.02527906	Physical Interactions	IREF-reactome
PDHA1	CA12	0.06586556	Physical Interactions	IREF-reactome		carbohydrate metabolic process; generation of precursor metabolites and energy; sulfur compound metabolic process; nucleobase-containing small molecule metabolic process; carbohydrate derivative metabolic process
PDHA1	PDHX	0.02527906	Physical Interactions	IREF-reactome
PDHA1	PDHB	0.02527906	Physical Interactions	IREF-reactome
PDHA1	DLAT	0.02527906	Physical Interactions	IREF-reactome
IDH3G	CA12	0.04770459	Physical Interactions	IREF-reactome		carbohydrate metabolic process; generation of precursor metabolites and energy
IDH3B	CA12	0.04770459	Physical Interactions	IREF-reactome		generation of precursor metabolites and energy
IDH3B	IDH3G	0.013260639	Physical Interactions	IREF-reactome
IDH3A	CA12	0.04770459	Physical Interactions	IREF-reactome		carbohydrate metabolic process; generation of precursor metabolites and energy
IDH3A	IDH3G	0.013260639	Physical Interactions	IREF-reactome
IDH3A	IDH3B	0.013260639	Physical Interactions	IREF-reactome
OGDH	CA12	0.043858252	Physical Interactions	IREF-reactome		cell motility; cell diferenciation; carbohydrate metabolic process; generation of precursor metabolites and energy; sulfur compound metabolic process; anatomical structure development; nucleobase-containing small molecule metabolic process
OGDH	IDH3G	0.012191457	Physical Interactions	IREF-reactome
OGDH	IDH3B	0.012191457	Physical Interactions	IREF-reactome
OGDH	IDH3A	0.012191457	Physical Interactions	IREF-reactome
IDH2	CA12	0.102153	Physical Interactions	Vastrik-Stein-2007
PDHX	CA12	0.06586556	Physical Interactions	Vastrik-Stein-2007
PDHB	CA12	0.06586556	Physical Interactions	Vastrik-Stein-2007
PDHB	PDHX	0.02527906	Physical Interactions	Vastrik-Stein-2007
DLAT	CA12	0.06586556	Physical Interactions	Vastrik-Stein-2007
DLAT	PDHX	0.02527906	Physical Interactions	Vastrik-Stein-2007
DLAT	PDHB	0.02527906	Physical Interactions	Vastrik-Stein-2007
PDHA1	CA12	0.06586556	Physical Interactions	Vastrik-Stein-2007
PDHA1	PDHX	0.02527906	Physical Interactions	Vastrik-Stein-2007
PDHA1	PDHB	0.02527906	Physical Interactions	Vastrik-Stein-2007
PDHA1	DLAT	0.02527906	Physical Interactions	Vastrik-Stein-2007
IDH3G	CA12	0.04770459	Physical Interactions	Vastrik-Stein-2007
IDH3B	CA12	0.04770459	Physical Interactions	Vastrik-Stein-2007
IDH3B	IDH3G	0.013260639	Physical Interactions	Vastrik-Stein-2007
IDH3A	CA12	0.04770459	Physical Interactions	Vastrik-Stein-2007
IDH3A	IDH3G	0.013260639	Physical Interactions	Vastrik-Stein-2007
IDH3A	IDH3B	0.013260639	Physical Interactions	Vastrik-Stein-2007
OGDH	CA12	0.043858252	Physical Interactions	Vastrik-Stein-2007
OGDH	IDH3G	0.012191457	Physical Interactions	Vastrik-Stein-2007
OGDH	IDH3B	0.012191457	Physical Interactions	Vastrik-Stein-2007
OGDH	IDH3A	0.012191457	Physical Interactions	Vastrik-Stein-2007
DLAT	PDHB	0.13230294	Physical Interactions	Wan-Emili-2015
PDHA1	PDHB	0.091140024	Physical Interactions	Wan-Emili-2015
PDHA1	DLAT	0.07405322	Physical Interactions	Wan-Emili-2015
IDH3G	IDH2	0.26311544	Physical Interactions	Wan-Emili-2015
IDH3B	IDH2	0.37382644	Physical Interactions	Wan-Emili-2015
IDH3A	IDH2	0.08246129	Physical Interactions	Wan-Emili-2015
IDH3A	IDH3G	0.079840474	Physical Interactions	Wan-Emili-2015
OGDH	DLAT	0.099385746	Physical Interactions	Wan-Emili-2015
OGDH	PDHA1	0.06846423	Physical Interactions	Wan-Emili-2015
PDHA1	PDHB	1	Physical Interactions	IREF-dip
PDHB	PDHX	0.2661027	Physical Interactions	Havugimana-Emili-2012
DLAT	PDHX	0.10776556	Physical Interactions	Havugimana-Emili-2012
PDHA1	PDHX	0.16231324	Physical Interactions	Havugimana-Emili-2012
PDHA1	PDHB	0.27834052	Physical Interactions	Havugimana-Emili-2012
PDHA1	DLAT	0.11272159	Physical Interactions	Havugimana-Emili-2012
OGDH	PDHX	0.09569558	Physical Interactions	Havugimana-Emili-2012
OGDH	PDHB	0.1641022	Physical Interactions	Havugimana-Emili-2012
OGDH	DLAT	0.06645767	Physical Interactions	Havugimana-Emili-2012
OGDH	PDHA1	0.10009653	Physical Interactions	Havugimana-Emili-2012
PDHB	PDHX	0.14432806	Physical Interactions	BIOGRID-SMALL-SCALE-STUDIES
DLAT	PDHX	0.13057435	Physical Interactions	BIOGRID-SMALL-SCALE-STUDIES
DLAT	PDHB	0.08251578	Physical Interactions	BIOGRID-SMALL-SCALE-STUDIES
PDHA1	PDHB	0.12484675	Physical Interactions	BIOGRID-SMALL-SCALE-STUDIES
DLAT	PDHX	0.06138046	Physical Interactions	Moutaoufik-Babu-2019
PDHA1	PDHB	0.010072992	Physical Interactions	Moutaoufik-Babu-2019
IDH3B	IDH3G	1	Physical Interactions	Moutaoufik-Babu-2019
OGDH	PDHB	0.011831275	Physical Interactions	Moutaoufik-Babu-2019
OGDH	PDHA1	0.013214715	Physical Interactions	Moutaoufik-Babu-2019
IDH3A	IDH3G	1	Physical Interactions	IREF-uniprotpp
PDHB	PDHX	0.11675942	Physical Interactions	Huttlin-Harper-2017
DLAT	PDHB	0.17978542	Physical Interactions	Huttlin-Harper-2017
PDHA1	PDHB	0.14289811	Physical Interactions	Huttlin-Harper-2017
IDH3B	IDH3G	0.27679747	Physical Interactions	Huttlin-Harper-2017
IDH3A	IDH3G	0.56000733	Physical Interactions	Huttlin-Harper-2017
IDH3A	IDH3B	0.34112567	Physical Interactions	Huttlin-Harper-2017
PDHA1	PDHB	0.012532097	Physical Interactions	Malty-Babu-2017
DLAT	PDHB	0.01642775	Physical Interactions	IREF-mint
LGALS7	CA12	0.5243401	Physical Interactions	IREF-hprd		Cell adhesion; programmed cell death
PDHB	PDHX	0.22514318	Physical Interactions	IREF-hprd
DLAT	PDHX	0.17235972	Physical Interactions	IREF-hprd
PDHA1	PDHB	0.14467765	Physical Interactions	IREF-hprd
PDHA1	DLAT	0.11075885	Physical Interactions	IREF-hprd
IDH3B	IDH3G	0.383114	Physical Interactions	IREF-hprd
IDH3A	IDH3G	0.5598326	Physical Interactions	IREF-hprd
IDH3A	IDH3B	0.3107708	Physical Interactions	IREF-hprd
PDHB	PDHX	0.15693212	Physical Interactions	Huttlin-Gygi-2015
DLAT	PDHB	0.23196004	Physical Interactions	Huttlin-Gygi-2015
PDHA1	PDHB	0.15693212	Physical Interactions	Huttlin-Gygi-2015
IDH3B	IDH3G	0.37709498	Physical Interactions	Huttlin-Gygi-2015
IDH3A	IDH3G	0.48433933	Physical Interactions	Huttlin-Gygi-2015
IDH3A	IDH3B	0.27827385	Physical Interactions	Huttlin-Gygi-2015
LGALS7	CA12	0.9228935	Physical Interactions	IREF-matrixdb
IDH3B	IDH3G	0.6000462	Physical Interactions	Lim-Zoghbi-2006
IDH3A	IDH3B	0.2896211	Physical Interactions	Lim-Zoghbi-2006
LGALS7	CA12	0.6505984	Physical Interactions	IREF-spike
PDHB	PDHX	0.3134244	Physical Interactions	IREF-spike
DLAT	PDHX	0.2918382	Physical Interactions	IREF-spike
PDHA1	PDHB	0.4574535	Physical Interactions	IREF-spike
PDHA1	DLAT	0.42594773	Physical Interactions	IREF-spike
IDH3B	IDH3G	0.6670008	Physical Interactions	IREF-spike
IDH3A	IDH3B	0.3218638	Physical Interactions	IREF-spike
PDHB	PDHX	0.37407598	Physical Interactions	Rual-Vidal-2005
DLAT	PDHX	0.26841986	Physical Interactions	Rual-Vidal-2005
PDHA1	PDHB	0.5678745	Physical Interactions	Rual-Vidal-2005
PDHA1	DLAT	0.40748087	Physical Interactions	Rual-Vidal-2005
PDHB	PDHX	0.11633664	Physical Interactions	IREF-SMALL-SCALE-STUDIES
DLAT	PDHX	0.047736105	Physical Interactions	IREF-SMALL-SCALE-STUDIES
DLAT	PDHB	0.042497143	Physical Interactions	IREF-SMALL-SCALE-STUDIES
PDHA1	PDHB	0.11028481	Physical Interactions	IREF-SMALL-SCALE-STUDIES
PDHA1	DLAT	0.04525287	Physical Interactions	IREF-SMALL-SCALE-STUDIES
IDH3B	IDH3G	0.46067473	Physical Interactions	IREF-SMALL-SCALE-STUDIES
IDH3A	IDH3G	0.4603639	Physical Interactions	IREF-SMALL-SCALE-STUDIES
IDH3A	IDH3B	0.3501202	Physical Interactions	IREF-SMALL-SCALE-STUDIES
DLAT	PDHX	0.57735026	Physical Interactions	Wang-Yang-2011
